# Supplementary material for: Exploring <em>Thinopyrum</em> spp. Group 7 Chromosome Introgressions to Improve Durum Wheat Performance under Intense Daytime and Night‐Time Heat Stress at Anthesis
Source: Preprints.org preprint supplement (doi:10.20944/preprints202408.0355.v1), 2024-08-06
Supplement: Supplementary file 1 [file supplementary]

## Sheet: Table S1-PHYSIOLOGY
	Table S1.	Physiological traits' means, standard errors (SE), ranking of Tukey test at P < 0.05 level in each column, and percentage (%) difference of mean values for each genotype between stress (IH) and control (C) conditions.
		A) Statistical comparison for time x genotype x treatment (Time x G x T) effect on repeated physiological measurements (SPAD, Fv/Fm, PI and SC traits) and for genotype x treatment (G x T) effect on other physiological and biochemical traits performed between the NIRLs ("+" vs. "⎼");
		B) Statistical comparison for time x genotype x treatment (Time x G x T) effect on repeated physiological measurements (SPAD, Fv/Fm, PI and SC traits) and for genotype x treatment (G x T) effect on other physiological and biochemical traits performed between the NIRLs+ and cv. Margherita.
	A)
	Genotype	Treatment		TRAITS																TRAITS
				SPAD			Fv/Fm			PI			SC				Genotype	Treatment		RWC	Pro-FL	Pro-SP	WSC-FL	WSC-SP	MDA-FL
				day 1	day 2	day 3	day 1	day 2	day 3	day 1	day 2	day 3	day 1	day 2	day 3
	R5+	C	Mean	57.3533	57.3867	57.0733	0.8444	0.8436	0.837	17.785	17.1912	15.9605	294.25	340.38	361.12		R5+	C	Mean	0.941685	3.29961	64.6975	0.102726	0.172323	6.28387
			SE	0.719382	0.833345	0.512437	0.00183303	0.00322077	0.00297769	0.410563	0.67469	0.566653	20.2086	30.5381	29.9303				SE	0.00211046	0.626375	6.33289	0.011062	0.0040738	0.484759
			Tukey	ns	ns	ns	ab	ac	ae	ac	ac	ae	ns	ns	ns				Tukey	ab	ce	ac	cd	c	ns
		IH	Mean	53.5911	54.3722	54.1196	0.8222	0.8175	0.803273	9.76027	8.18008	6.75191	43.8615	79.9308	89.8727			IH	Mean	0.885447	6.45958	39.2538	0.138928	0.214869	7.5914
			SE	0.711172	0.733966	0.880593	0.00310943	0.00256348	0.00374993	0.565317	0.737875	0.49605	5.8031	21.1744	23.3873				SE	0.00939705	0.188906	1.37953	0.00670486	0.00624862	0.570793
			Tukey	ns	ns	ns	eg	fg	g	h	h	h	ns	ns	ns				Tukey	c	be	bd	bd	ac	ns
		% difference IH vs. C		-6.55973	-5.25287	-5.17539	-2.62909	-3.09388	-4.02954	-45.1208	-52.417	-57.6961	-85.0938	-76.5172	-75.1128			% difference IH vs. C		-5.97205	95.7678	-39.3271	35.2417	24.6896	20.8077
	R5-	C	Mean	56.1733	55.3	56.3667	0.84225	0.84	0.8292	16.1587	14.5663	13.7978	372.96	328.425	402.8		R5-	C	Mean	0.952257	3.61329	73.4854	0.0990923	0.194956	5.72473
			SE	1.28923	1.36312	0.929185	0.00313648	0.00158114	0.00301552	0.554476	0.51061	0.854449	37.6173	32.388	21.7252				SE	0.0095553	0.622449	8.06179	0.0141026	0.0173279	0.470462
			Tukey	ns	ns	ns	ad	ad	bf	ae	ag	bg	ns	ns	ns				Tukey	a	ce	a	cd	bc	ns
		IH	Mean	53.2222	54.6212	54.2422	0.830583	0.818444	0.814833	11.6312	9.41956	6.95986	92.325	137.48	145.85			IH	Mean	0.944439	3.09137	35.3074	0.131991	0.214159	7.8129
			SE	0.951483	0.763822	0.663093	0.002524	0.00459737	0.00369309	0.573903	0.936543	0.543863	15.192	28.4787	33.8143				SE	0.00667545	0.781142	3.43244	0.00269136	0.00394478	0.00372484
			Tukey	ns	ns	ns	bf	fg	fg	dh	h	h	ns	ns	ns				Tukey	a	ce	bd	bd	ac	ns
		% difference IH vs. C		-5.25358	-1.22746	-3.76897	-1.38518	-2.56614	-1.73259	-28.0194	-35.333	-49.5582	-75.2453	-58.1396	-63.791			% difference IH vs. C		-0.821077	-14.4445	-51.9531	33.2002	9.85016	36.4763
	R112+	C	Mean	52.5667	53.1767	52.9467	0.8432	0.8406	0.8414	16.661	15.25	15.2902	324.343	300.74	345.72		R112+	C	Mean	0.960235	2.4515	64.8054	0.0798326	0.184123	5.09247
			SE	1.23064	0.779329	0.966824	0.00193391	0.0021587	0.00242074	0.487084	0.568085	0.935454	28.6111	18.5528	31.717				SE	0.00728666	0.719727	8.67497	0.0049609	0.0156945	0.510892
			Tukey	ns	ns	ns	ac	ad	ad	ad	af	ae	ns	ns	ns				Tukey	a	de	ab	d	c	ns
		IH	Mean	52.0963	52.963	51.9622	0.834667	0.83525	0.8114	12.2001	12.7054	7.1174	82.1111	115.367	83.1625			IH	Mean	0.943231	7.66799	42.2134	0.140597	0.281242	5.43387
			SE	0.567005	0.449347	0.456206	0.00215381	0.00182981	0.00206398	0.837602	0.865101	0.433012	14.4516	13.0745	12.8367				SE	0.00787584	1.13292	3.26957	0.00612699	0.0190514	0.552316
			Tukey	ns	ns	ns	af	af	fg	dh	ch	h	ns	ns	ns				Tukey	a	bd	ad	bd	ab	ns
		% difference IH vs. C		-0.894807	-0.401875	-1.85931	-1.01202	-0.63645	-3.56549	-26.7744	-16.6861	-53.4513	-74.6839	-61.6391	-75.9451			% difference IH vs. C		-1.7708	212.787	-34.8613	76.1144	52.7466	6.70397
	R112-	C	Mean	54.32	53.12	54.8667	0.84725	0.8436	0.8372	16.361	16.186	14.9716	303.82	301.275	369.153		R112-	C	Mean	0.957562	2.90205	58.3349	0.133789	0.200678	5.2172
			SE	0.674586	1.07039	0.783926	0.00179931	0.00258972	0.00152971	0.755254	0.572346	0.729349	22.1924	28.4071	22.9827				SE	0.000797011	0.888025	5.56694	0.00924025	0.018985	0.419278
			Tukey	ns	ns	ns	ab	ac	ae	ae	ae	af	ns	ns	ns				Tukey	a	ce	ad	bd	bc	ns
		IH	Mean	53.7476	54.3048	54.3571	0.827214	0.823357	0.815778	10.5512	9.55457	8.6751	115.255	143.45	126.186			IH	Mean	0.948804	2.30965	33.4478	0.117024	0.207566	4.88602
			SE	0.570207	0.527633	0.634208	0.00240462	0.00310017	0.00286637	0.52835	0.587611	0.567302	29.3379	23.989	34.7892				SE	0.0110412	1.07743	3.50464	0.00744892	0.0248031	0.50561
			Tukey	ns	ns	ns	cf	df	fg	fh	h	h	ns	ns	ns				Tukey	a	de	bd	cd	bc	ns
		% difference IH vs. C		-1.05372	2.23035	-0.928658	-2.36479	-2.39958	-2.55879	-35.51	-40.9702	-42.0563	-62.0649	-52.3857	-65.8175			% difference IH vs. C		-0.914556	-20.4132	-42.6623	-12.5305	3.43	-6.3479
	R69-9/R5+	C	Mean	48.8889	47.98	47.4178	0.8421	0.839	0.8374	16.0696	14.7193	14.3156	264.457	329.2	295.418		R69-9/R5+	C	Mean	0.965549	3.25983	31.0195	0.112246	0.226813	5.42151
			SE	0.950665	0.929805	0.814944	0.00158079	0.00168325	0.00212648	0.558353	0.512963	0.493785	32.7188	14.681	25.1811				SE	0.00131081	0.461964	0.783542	0.00457948	0.0064491	0.239503
			Tukey	ns	ns	ns	ad	ad	ad	ae	af	bg	ns	ns	ns				Tukey	a	ce	cd	cd	ac	ns
		IH	Mean	45.2857	42.6424	42.3	0.825143	0.819889	0.820417	9.87286	7.47273	7.83133	71.3571	108.4	95.2			IH	Mean	0.93659	21.7816	40.3129	0.321192	0.263756	5.83226
			SE	1.07456	1.49829	1.78034	0.0026406	0.00349108	0.00263846	0.566672	0.530731	0.549325	16.6938	29.7061	25.1099				SE	0.00740316	1.60588	6.58572	0.0277121	0.00510082	0.448529
			Tukey	ns	ns	ns	cf	eg	eg	gh	h	h	ns	ns	ns				Tukey	ab	a	bd	a	ac	ns
		% difference IH vs. C		-7.37013	-11.1246	-10.793	-2.01367	-2.27784	-2.0281	-38.5619	-49.2316	-45.2951	-73.0175	-67.0717	-67.7745			% difference IH vs. C		-2.9992	568.182	29.9598	186.149	16.2876	7.58
	R69-9/R5-	C	Mean	52.9619	52.5048	53.4762	0.847714	0.845714	0.843429	18.953	19.4371	18.2157	297.267	270.867	331.32		R69-9/R5-	C	Mean	0.958076	1.90365	25.7574	0.132668	0.224832	4.72043
			SE	1.15376	1.11642	1.17006	0.00132223	0.000644179	0.00268024	0.553481	0.385756	0.771793	19.1645	22.2019	28.2038				SE	0.00406218	0.598413	2.17811	0.0128721	0.0147837	0.199282
			Tukey	ns	ns	ns	a	ab	a-c	ab	a	ab	ns	ns	ns				Tukey	a	e	d	bd	ac	ns
		IH	Mean	45.8733	44.4167	41.8167	0.833778	0.8217	0.818857	11.9827	8.50717	7.961	102.41	141.689	150.95			IH	Mean	0.892059	8.2044	53.4287	0.212303	0.307578	6.94516
			SE	1.4301	1.63935	1.57379	0.0019349	0.00331402	0.00232487	0.677415	0.665046	0.427219	15.523	29.4402	26.1787				SE	0.00914387	1.41204	3.95607	0.0233493	0.00711442	0.728206
			Tukey	ns	ns	ns	af	eg	eg	dh	h	h	ns	ns	ns				Tukey	bc	bc	ad	b	a	ns
		% difference IH vs. C		-13.3843	-15.4045	-21.8032	-1.64401	-2.83953	-2.91328	-36.7769	-56.2324	-56.296	-65.5495	-47.6905	-54.4398			% difference IH vs. C		-6.89059	330.981	107.431	60.0258	36.8036	47.1298
	R69-9/R112+	C	Mean	46.5741	45.0028	45.3667	0.843556	0.8415	0.839867	17.5595	16.2464	15.0022	331.817	380.014	334.489		R69-9/R112+	C	Mean	0.953632	2.31416	32.8093	0.111421	0.221991	5.62796
			SE	0.949578	1.13828	0.939718	0.00261996	0.00209364	0.00229257	0.818402	0.957871	0.641425	13.1009	13.4229	16.5565				SE	0.00417482	0.327981	0.897592	0.00977524	0.0135039	0.13647
			Tukey	ns	ns	ns	ac	ad	ad	ac	ad	af	ns	ns	ns				Tukey	a	de	cd	cd	ac	ns
		IH	Mean	43.8148	44.0148	42.6216	0.83225	0.835714	0.816733	11.3481	11.2617	8.24993	99.0778	148.387	92.8786			IH	Mean	0.932214	8.49673	48.2692	0.170769	0.197083	6.38925
			SE	0.821535	1.02022	0.710379	0.00303109	0.00301019	0.00288309	1.08245	0.88446	0.419363	26.0926	23.081	14.5768				SE	0.00941268	1.63493	7.13491	0.0129159	0.0179847	0.440876
			Tukey	ns	ns	ns	bf	ae	fg	dh	eh	h	ns	ns	ns				Tukey	ab	bc	ad	bc	bc	ns
		% difference IH vs. C		-5.92445	-2.19534	-6.05091	-1.34023	-0.687548	-2.75441	-35.3733	-30.6823	-45.0085	-70.1408	-60.9521	-72.2327			% difference IH vs. C		-2.24591	267.163	47.1202	53.2645	-11.2205	13.53
	R69-9/R112-	C	Mean	49.9333	48.6205	49.2262	0.842615	0.838154	0.835786	16.3202	14.5176	13.2271	320.809	381.564	330.14		R69-9/R112-	C	Mean	0.960043	3.05746	25.6009	0.0935638	0.217713	5.81935
			SE	0.905906	1.09836	1.00099	0.00194652	0.00214283	0.00224876	0.90465	0.812967	0.745636	43.0433	49.1323	31.8759				SE	0.0042614	0.878289	1.12992	0.00535259	0.0135039	0.557458
			Tukey	ns	ns	ns	ac	ad	ae	ad	bg	cg	ns	ns	ns				Tukey	a	ce	d	d	ac	ns
		IH	Mean	49.5571	48.1273	49.9044	0.822333	0.822111	0.818333	8.71683	8.79433	8.53993	44.9143	107.808	131.627			IH	Mean	0.890156	11.3435	57.7063	0.210284	0.232559	6.93763
			SE	1.79797	1.43213	1.24609	0.00272263	0.00351645	0.00216392	0.429439	0.49887	0.346665	9.40259	25.0185	22.3294				SE	0.0139227	1.7396	8.79379	0.0223666	0.0259322	0.497042
			Tukey	ns	ns	ns	dg	eg	fg	h	h	h	ns	ns	ns				Tukey	c	b	ad	b	ac	ns
		% difference IH vs. C		-0.753385	-1.01447	1.37783	-2.40704	-1.91406	-2.08814	-46.5888	-39.423	-35.436	-85.9997	-71.7458	-60.13			% difference IH vs. C		-7.27955	271.01	125.408	124.75	6.82	19.2166
	B)
				TRAITS																TRAITS
	Genotype	Treatment		SPAD			Fv/Fm			PI			SC				Genotype	Treatment		RWC	Pro-FL	Pro-SP	WSC-FL	WSC-SP	MDA-FL
				day 1	day 2	day 3	day 1	day 2	day 3	day 1	day 2	day 3	day 1	day 2	day 3
	R5+	C	Mean	57.3533	57.3867	57.0733	0.8444	0.8436	0.837	17.785	17.1912	15.9605	294.25	340.38	361.12		R5+	C	Mean	0.941685	3.29961	64.6975	0.102726	0.172323	6.28387
			SE	0.719382	0.833345	0.512437	0.00183303	0.00322077	0.00297769	0.410563	0.67469	0.566653	20.2086	30.5381	29.9303				SE	0.00211046	0.626375	6.33289	0.011062	0.0040738	0.484759
			Tukey	ns	ns	ns	ab	ab	ab	ns	ns	ns	ns	ns	ns				Tukey	a	bc	ab	ce	c	ns
		IH	Mean	53.5911	54.3722	54.1196	0.8222	0.8175	0.803273	9.76027	8.18008	6.75191	43.8615	79.9308	89.8727			IH	Mean	0.885447	6.45958	39.2538	0.138928	0.214869	7.5914
			SE	0.711172	0.733966	0.880593	0.00310943	0.00256348	0.00374993	0.565317	0.737875	0.49605	5.8031	21.1744	23.3873				SE	0.00939705	0.188906	1.37953	0.00670486	0.00624862	0.570793
			Tukey	ns	ns	ns	cd	de	e	ns	ns	ns	ns	ns	ns				Tukey	b	bc	ac	bd	ac	ns
		% difference IH vs. C		-6.55973	-5.25287	-5.17539	-2.62909	-3.09388	-4.02954	-45.1208	-52.417	-57.6961	-85.0938	-76.5172	-75.1128			% difference IH vs. C		-5.97205	95.7678	-39.3271	35.2417	24.6896	20.8077
	R112+	C	Mean	52.5667	53.1767	52.9467	0.8432	0.8406	0.8414	16.661	15.25	15.2902	324.343	300.74	345.72		R112+	C	Mean	0.960235	2.4515	64.8054	0.0798326	0.184123	5.09247
			SE	1.23064	0.779329	0.966824	0.00193391	0.0021587	0.00242074	0.487084	0.568085	0.935454	28.6111	18.5528	31.717				SE	0.00728666	0.719727	8.67497	0.0049609	0.0156945	0.510892
			Tukey	ns	ns	ns	ab	ab	ab	ns	ns	ns	ns	ns	ns				Tukey	a	c	a	de	c	ns
		IH	Mean	52.0963	52.963	51.9622	0.834667	0.83525	0.8114	12.2001	12.7054	7.1174	82.1111	115.367	83.1625			IH	Mean	0.943231	7.66799	42.2134	0.140597	0.281242	5.43387
			SE	0.567005	0.449347	0.456206	0.00215381	0.00182981	0.00206398	0.837602	0.865101	0.433012	14.4516	13.0745	12.8367				SE	0.00787584	1.13292	3.26957	0.00612699	0.0190514	0.552316
			Tukey	ns	ns	ns	ad	ad	de	ns	ns	ns	ns	ns	ns				Tukey	a	b	ac	bd	a	ns
		% difference IH vs. C		-0.894807	-0.401875	-1.85931	-1.01202	-0.63645	-3.56549	-26.7744	-16.6861	-53.4513	-74.6839	-61.6391	-75.9451			% difference IH vs. C		-1.7708	212.787	-34.8613	76.1144	52.7466	6.70397
	R69-9/R5+	C	Mean	48.8889	47.98	47.4178	0.8421	0.839	0.8374	16.0696	14.7193	14.3156	264.457	329.2	295.418		R69-9/R5+	C	Mean	0.965549	3.25983	31.0195	0.112246	0.226813	5.42151
			SE	0.950665	0.929805	0.814944	0.00158079	0.00168325	0.00212648	0.558353	0.512963	0.493785	32.7188	14.681	25.1811				SE	0.00131081	0.461964	0.783542	0.00457948	0.0064491	0.239503
			Tukey	ns	ns	ns	ab	ab	ab	ns	ns	ns	ns	ns	ns				Tukey	a	bc	c	b-e	a-c	ns
		IH	Mean	45.2857	42.6424	42.3	0.825143	0.819889	0.820417	9.87286	7.47273	7.83133	71.3571	108.4	95.2			IH	Mean	0.93659	21.7816	40.3129	0.321192	0.263756	5.83226
			SE	1.07456	1.49829	1.78034	0.0026406	0.00349108	0.00263846	0.566672	0.530731	0.549325	16.6938	29.7061	25.1099				SE	0.00740316	1.60588	6.58572	0.0277121	0.00510082	0.448529
			Tukey	ns	ns	ns	bd	ce	cd	ns	ns	ns	ns	ns	ns				Tukey	a	a	ac	a	ab	ns
		% difference IH vs. C		-7.37013	-11.1246	-10.793	-2.01367	-2.27784	-2.0281	-38.5619	-49.2316	-45.2951	-73.0175	-67.0717	-67.7745			% difference IH vs. C		-2.9992	568.182	29.9598	186.149	16.2876	7.58
	R69-9/R112+	C	Mean	46.5741	45.0028	45.3667	0.843556	0.8415	0.839867	17.5595	16.2464	15.0022	331.817	380.014	334.489		R69-9/R112+	C	Mean	0.953632	2.31416	32.8093	0.111421	0.221991	5.62796
			SE	0.949578	1.13828	0.939718	0.00261996	0.00209364	0.00229257	0.818402	0.957871	0.641425	13.1009	13.4229	16.5565				SE	0.00417482	0.327981	0.897592	0.00977524	0.0135039	0.13647
			Tukey	ns	ns	ns	ab	ab	ab	ns	ns	ns	ns	ns	ns				Tukey	a	c	bc	c-e	a-c	ns
		IH	Mean	43.8148	44.0148	42.6216	0.83225	0.835714	0.816733	11.3481	11.2617	8.24993	99.0778	148.387	92.8786			IH	Mean	0.932214	8.49673	48.2692	0.170769	0.197083	6.38925
			SE	0.821535	1.02022	0.710379	0.00303109	0.00301019	0.00288309	1.08245	0.88446	0.419363	26.0926	23.081	14.5768				SE	0.00941268	1.63493	7.13491	0.0129159	0.0179847	0.440876
			Tukey	ns	ns	ns	ad	ac	de	ns	ns	ns	ns	ns	ns				Tukey	a	b	ac	b	bc	ns
		% difference IH vs. C		-5.92445	-2.19534	-6.05091	-1.34023	-0.687548	-2.75441	-35.3733	-30.6823	-45.0085	-70.1408	-60.9521	-72.2327			% difference IH vs. C		-2.24591	267.163	47.1202	53.2645	-11.2205	13.53
	Margherita	C	Mean	53.8083	53.3208	53.5083	0.848	0.84625	0.8445	15.1647	15.3423	15.564	454.55	444.15	498.825		Margherita	C	Mean	0.946092	5.72097	54.7147	0.0680779	0.181986	4.39785
			SE	1.49987	1.83505	1.22983	0.000547723	0.000858778	0.000921954	0.294453	0.79616	0.277966	17.0383	10.0696	18.3125				SE	0.00658604	0.624428	3.37265	0.00283794	0.0261602	0.408755
			Tukey	ns	ns	ns	a	ab	ab	ns	ns	ns	ns	ns	ns				Tukey	a	bc	a-c	e	c	ns
		IH	Mean	52.8111	54.1667	53.8061	0.8179	0.817385	0.819583	7.7304	8.09338	8.12833	80.1231	68.5846	80.525			IH	Mean	0.865953	3.68326	52.8913	0.170164	0.227686	6.26613
			SE	0.753655	0.853006	0.887145	0.00223333	0.00342689	0.0028827	0.417467	0.568316	0.441916	24.723	24.723	21.4496				SE	0.0159249	0.968419	5.91698	0.011427	0.0155131	0.516638
			Tukey	ns	ns	ns	de	de	ce	ns	ns	ns	ns	ns	ns				Tukey	b	bc	ac	bc	ac	ns
		% difference IH vs. C		-1.85329	1.58631	0.556413	-3.54953	-3.41098	-2.95046	-49.0239	-47.2477	-47.7748	-82.3731	-84.5582	-83.8571			% difference IH vs. C		-8.47053	-35.6182	-3.33263	149.955	25.1116	42.4817

## Sheet: Table S2-YIELD
	Table S2.	Yield traits' means, standard errors (SE), ranking of Tukey test at P < 0.05 level in each column, and percentage (%) difference of mean values for each genotype between stress (IH) and control (C) conditions.
		A) Statistical comparison for genotype x treatment (G x T) effect on yield traits performed between the NIRLs ("+" vs. "⎼");
		B) Statistical comparison for genotype x treatment (G x T) effect on yield traits performed between the NIRLs+ and cv. Margherita.
	A)
				TRAITS
	Genotype	Treatment		GNS1	SFI1	TGW1	GY1	TNP	PTP	GNP	SFI	TGW	HI	GYP
	R5+	C	Mean	39.2857	76.3959	50.5983	1.98857	2.71429	2.57143	72.8333	71.4446	47.9907	0.415716	3.79857
			SE	1.56926	3.17573	1.58503	0.101264	0.359516	0.297381	2.94863	3.68876	1.26638	0.0113162	0.298436
			Tukey	ns	ns	ns	a-d	ns	ns	bc	ns	ns	ns	be
		IH	Mean	23.1429	58.6215	59.7276	1.38429	3.42857	2.42857	42	46.7936	60.0625	0.386699	2.74167
			SE	1.05624	2.75196	1.23376	0.0771164	0.202031	0.297381	4.89898	3.78005	0.825018	0.0111565	0.210941
			Tukey	ns	ns	ns	e	ns	ns	d	ns	ns	ns	e
		% difference IH vs. C		− 41,09	− 23,27	18.0428	− 30,39	33.46	− 5,45	− 42,33	− 34,50	25.1544	− 6,98	− 27,82
	R5-	C	Mean	40.2857	82.0988	48.4501	1.96143	2.14286	2.14286	72.2857	82.3249	48.8835	0.368617	3.51714
			SE	1.4592	4.24521	1.63863	0.131429	0.142857	0.142857	5.9109	4.17501	2.10033	0.0248445	0.311721
			Tukey	ns	ns	ns	a-d	ns	ns	bc	ns	ns	ns	ce
		IH	Mean	31.2857	65.8792	57.2344	1.70143	2	2	51.7143	64.0281	53.0818	0.289835	2.73571
			SE	1.32223	5.48025	1.30118	0.0908538	0	0	2.80912	5.44668	2.58395	0.0245245	0.169928
			Tukey	ns	ns	ns	de	ns	ns	cd	ns	ns	ns	e
		% difference IH vs. C		− 22,34	− 19,76	18.1306	− 13,26	− 6,54	− 6,54	− 28,46	− 22,23	8.58833	− 21,37	− 22,22
	R112+	C	Mean	44.5	78.0816	46.1735	2.04833	2.33333	2.16667	76	80.0815	43.8546	0.34997	3.60667
			SE	1.05672	3.70083	1.44065	0.0367348	0.210819	0.166667	4.44972	3.13771	1.52759	0.0275897	0.268125
			Tukey	ns	ns	ns	a-d	ns	ns	a-c	ns	ns	ns	c-e
		IH	Mean	35.3333	70.7712	51.8643	1.73714	2.85714	2.42857	66.5714	67.1199	49.7487	0.356809	3.26143
			SE	1.66667	3.06772	2.22801	0.108028	0.340068	0.202031	4.20236	3.76124	2.26268	0.0227049	0.0987404
			Tukey	ns	ns	ns	de	ns	ns	bcd	ns	ns	ns	de
		% difference IH vs. C		− 20,60	− 9,36	12.3248	− 15,19	22.75	11.98	− 12,41	− 16,19	13.4401	1.95408	− 9,57
	R112-	C	Mean	40	82.5285	49.9365	1.92	2	2	74.625	82.7104	46.8924	0.354818	3.365
			SE	2.24669	2.84209	1.76078	0.0917969	0	0	3.59035	2.09359	1.40294	0.020699	0.235538
			Tukey	ns	ns	ns	b-e	ns	ns	bc	ns	ns	ns	c-e
		IH	Mean	30.7143	73.1768	54.4588	1.66714	2.14286	2.14286	57.5714	68.0107	52.9293	0.285395	3.03714
			SE	0.993174	3.04462	2.23318	0.0698882	0.142857	0.142857	2.14761	2.55366	2.23735	0.0106643	0.139364
			Tukey	ns	ns	ns	de	ns	ns	cd	ns	ns	ns	de
		% difference IH vs. C		− 23,21	− 11,33	9.05605	− 13,17	7	7	− 22,85	− 17,77	12.874	− 19,57	− 9,74
	R69-9/R5+	C	Mean	39.8	77.556	52.0811	2.063	2.57143	2.28571	89.4	74.9551	45.9609	0.410028	4.013
			SE	1.76887	4.30779	1.41638	0.0890449	0.275321	0.170747	6.28967	2.70052	2.21258	0.0206495	0.207402
			Tukey	ns	ns	ns	a-d	ns	ns	ab	ns	ns	ns	b-d
		IH	Mean	31.0909	61.3022	59.8889	1.85364	3	2.33333	52.1667	54.0293	59.766	0.322277	3.384
			SE	1.60371	3.98406	1.87742	0.0983803	0.281718	0.281718	4.50224	3.06614	1.89194	0.0176038	0.193202
			Tukey	ns	ns	ns	ce	ns	ns	cd	ns	ns	ns	cde
		% difference IH vs. C		− 21,88	− 20,96	14.9916	− 10,15	16.73	1.75	− 41,65	− 27,92	30.0367	− 21,40	− 15,67
	R69-9/R5-	C	Mean	43	77.6357	50.8523	2.19	2.28571	2.28571	99.7273	75.5094	44.4319	0.394182	4.37818
			SE	1.76841	3.74155	1.11526	0.110708	0.184428	0.184428	4.56885	2.01094	1.63493	0.0233245	0.147672
			Tukey	ns	ns	ns	a-c	ns	ns	a	ns	ns	ns	a-c
		IH	Mean	31.8889	68.5023	55.7336	1.765	2.33333	2.33333	61.0556	56.8555	55.8533	0.324465	3.29944
			SE	1.09928	3.5532	1.41396	0.0574015	0.142134	0.142134	4.22216	3.29453	1.65525	0.01978	0.12666
			Tukey	ns	ns	ns	de	ns	ns	cd	ns	ns	ns	de
		% difference IH vs. C		− 25,84	− 11,76	9.59896	− 19,41	1.75	1.75	− 38,78	− 24,70	25.7054	− 17,69	− 24,64
	R69-9/R112+	C	Mean	44.0909	79.2028	55.3563	2.43091	2.57143	2.28571	99.1818	82.0043	49.9195	0.430679	4.90636
			SE	1.85597	2.62602	1.53525	0.105868	0.202031	0.184428	4.65309	1.99941	1.7446	0.0257327	0.196849
			Tukey	ns	ns	ns	a	ns	ns	a	ns	ns	ns	ab
		IH	Mean	30.1875	63.4726	58.5907	1.7575	3.22222	2.77778	61.8125	57.7165	58.1438	0.326679	3.59188
			SE	0.984119	2.29913	1.23842	0.0462376	0.222222	0.146986	2.92435	2.61861	1.15882	0.0146475	0.186979
			Tukey	ns	ns	ns	de	ns	ns	cd	ns	ns	ns	ce
		% difference IH vs. C		− 31,53	− 19,86	5.84287	− 27,70	25.29	21.4	− 37,68	− 29,62	16.475	− 24,15	− 26,79
	R69-9/R112-	C	Mean	41.3	77.8773	55.9964	2.318	2.42857	2.42857	104.3	78.9021	49.3571	0.413565	5.05
			SE	1.6128	3.00832	0.903262	0.111851	0.202031	0.202031	6.55752	2.29435	1.92424	0.0182919	0.17112
			Tukey	ns	ns	ns	ab	ns	ns	a	ns	ns	ns	a
		IH	Mean	28.5	56.1228	60.1867	1.70429	3	2.11111	50.2857	46.7401	59.91	0.302538	2.68222
			SE	1.51458	3.4297	1.39209	0.0844485	0.235702	0.260579	4.59984	3.19496	1.09513	0.0229164	0.337198
			Tukey	ns	ns	ns	de	ns	ns	cd	ns	ns	ns	e
		% difference IH vs. C		− 30,99	− 27,93	7.48315	− 26,48	23.46	13.17	− 51,79	− 40,76	21.3807	− 26,85	− 46,89
	B)
				TRAITS
	Genotype	Treatment		GNS1	SFI1	TGW1	GY1	TNP	PTP	GNP	SFI	TGW	HI	GYP
	R5+	C	Mean	39.2857	76.3959	50.5983	1.98857	2.71429	2.57143	72.8333	71.4446	47.9907	0.415716	3.79857
			SE	1.56926	3.17573	1.58503	0.101264	0.359516	0.297381	2.94863	3.68876	1.26638	0.0113162	0.298436
			Tukey	ab	ns	ns	b	ns	ns	bc	ab	ns	ab	ac
		IH	Mean	23.1429	58.6215	59.7276	1.38429	3.42857	2.42857	42	46.7936	60.0625	0.386699	2.74167
			SE	1.05624	2.75196	1.23376	0.0771164	0.202031	0.297381	4.89898	3.78005	0.825018	0.0111565	0.210941
			Tukey	ef	ns	ns	cd	ns	ns	d	de	ns	ab	cd
		% difference IH vs. C		− 41,09	− 23,27	18.0428	− 30,39	33.46	− 5,45	− 42,33	− 34,50	25.1544	− 6,98	− 27,82
	R112+	C	Mean	44.5	78.0816	46.1735	2.04833	2.33333	2.16667	76	80.0815	43.8546	0.34997	3.60667
			SE	1.05672	3.70083	1.44065	0.0367348	0.210819	0.166667	4.44972	3.13771	1.52759	0.0275897	0.268125
			Tukey	a	ns	ns	ab	ns	ns	ac	a	ns	ab	bc
		IH	Mean	35.3333	70.7712	51.8643	1.73714	2.85714	2.42857	66.5714	67.1199	49.7487	0.356809	3.26143
			SE	1.66667	3.06772	2.22801	0.108028	0.340068	0.202031	4.20236	3.76124	2.26268	0.0227049	0.0987404
			Tukey	bd	ns	ns	bc	ns	ns	c	ac	ns	ab	bd
		% difference IH vs. C		− 20,60	− 9,36	12.3248	− 15,19	22.75	11.98	− 12,41	− 16,19	13.4401	1.95408	− 9,57
	R69-9/R5+	C	Mean	39.8	77.556	52.0811	2.063	2.57143	2.28571	89.4	74.9551	45.9609	0.410028	4.013
			SE	1.76887	4.30779	1.41638	0.0890449	0.275321	0.170747	6.28967	2.70052	2.21258	0.0206495	0.207402
			Tukey	ab	ns	ns	ab	ns	ns	ab	a	ns	ab	ab
		IH	Mean	31.0909	61.3022	59.8889	1.85364	3	2.33333	52.1667	54.0293	59.766	0.322277	3.384
			SE	1.60371	3.98406	1.87742	0.0983803	0.281718	0.281718	4.50224	3.06614	1.89194	0.0176038	0.193202
			Tukey	cd	ns	ns	b	ns	ns	cd	cd	ns	b	bc
		% difference IH vs. C		− 21,88	− 20,96	14.9916	− 10,15	16.73	1.75	− 41,65	− 27,92	30.0367	− 21,40	− 15,67
	R69-9/R112+	C	Mean	44.0909	79.2028	55.3563	2.43091	2.57143	2.28571	99.1818	82.0043	49.9195	0.430679	4.90636
			SE	1.85597	2.62602	1.53525	0.105868	0.202031	0.184428	4.65309	1.99941	1.7446	0.0257327	0.196849
			Tukey	a	ns	ns	a	ns	ns	a	a	ns	a	a
		IH	Mean	30.1875	63.4726	58.5907	1.7575	3.22222	2.77778	61.8125	57.7165	58.1438	0.326679	3.59188
			SE	0.984119	2.29913	1.23842	0.0462376	0.222222	0.146986	2.92435	2.61861	1.15882	0.0146475	0.186979
			Tukey	de	ns	ns	bc	ns	ns	cd	bd	ns	b	bc
		% difference IH vs. C		− 31,53	− 19,86	5.84287	− 27,70	25.29	21.4	− 37,68	− 29,62	16.475	− 24,15	− 26,79
	Margherita	C	Mean	38.5714	76.7287	50.6224	1.94714	3	3	102	75.2265	48.3207	0.408764	4.93571
			SE	1.42857	2.6729	1.50585	0.0702958	0	0	4.83539	2.56957	1.28793	0.0055062	0.28687
			Tukey	ac	ns	ns	b	ns	ns	a	a	ns	ab	a
		IH	Mean	21.5714	56.4853	54.5336	1.16429	3.14286	2.85714	42.2857	32.4431	54.7297	0.307757	2.31857
			SE	2.67134	5.98281	1.79675	0.136047	0.142857	0.142857	4.30788	4.36044	1.45599	0.019739	0.250299
			Tukey	f	ns	ns	d	ns	ns	d	e	ns	b	d
		% difference IH vs. C		− 44,07	− 26,38	7.72	− 40,51	4.67	− 4,67	− 58,54	− 56,88	13.27	− 24,39	− 53,04
